# Supplementary figures and images for: Charge-reversal polymeric nanomodulators for ferroptosis-enhanced photodynamic therapy
Source: Royal Society of Chemistry journal article supplement (doi:10.1039/d4tb00616j), 2024-01-01

We provide the raw data for western blot in Figure 4d in the manuscript.

GPX4

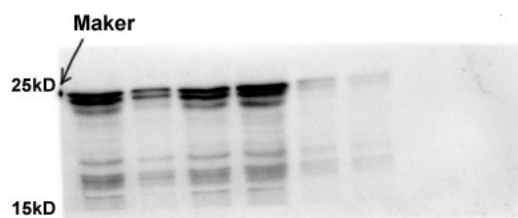

$\beta$ -actin

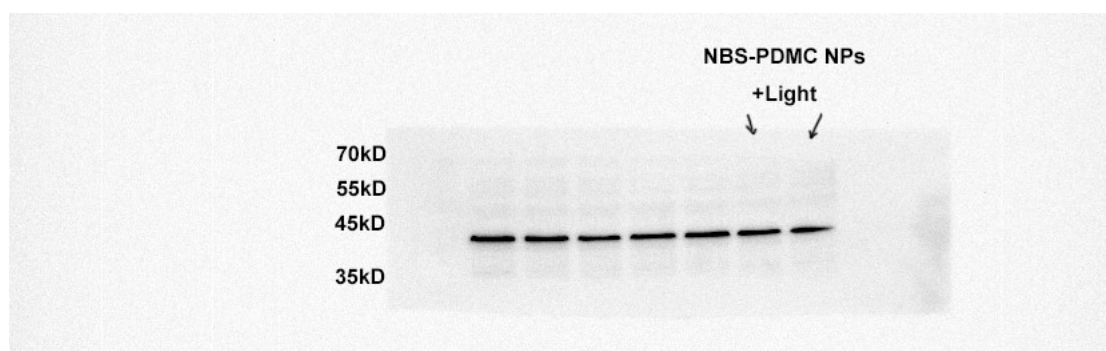

Supplement: d4tb00616j2.pdf [file d4tb00616j2.pdf]
